# Supplementary material for: Epithelial Tissue Hyperplasia Induced by the RAF Inhibitor PF-04880594 Is Attenuated by a Clinically Well-Tolerated Dose of the MEK Inhibitor PD-0325901
Source: Oxford University Press journal article supplement (doi:10.1158/1535-7163.mct-11-0984), 2012-07-03
Supplement: 15357163mct110984-sup-figleg.pdf [file 15357163mct110984-sup-figleg.pdf]

**Supplementary Figure S1. Relationship between oral doses and average plasma concentrations of PD-0325901 in athymic nu/nu mice.** Shaded area represents average plasma concentrations of PD-0325901 in patients of Phase I trial (17). Average concentrations ( $C_{ave}$ ) were calculated by the area under plasma concentration-time curve from time 0 to end of dosing interval divided by dosing interval period.

**Supplementary Figure S2. PD-0325901 reverses body weight loss due to PF-04880594 administration in nude mice.** Changes in body weight over a 2-week period were measured in nude mice treated with 40 mg/kg PF-04880594 alone or with 40 mg/kg PF-04880594 co-administered with 0.3, 1.0, or 2.5 mg/kg PD-0325901. Mice treated with PF-04880594 alone were euthanized on Day 7 due to the onset of moribundity. Mice co-treated with PD-0325901 maintained higher body weights by Day 15 and survived to the end of the study.

**Supplementary Figure S3. Photographs of canine muzzles showing skin flushing following PF-04880594 treatment.** Canines treated with PF-04880594 exhibited a noticeable flushing of the skin, visible through the fur, approximately 30 minutes after dosing.
